# Supplementary material for: Accuracy of reporting of malaria rapid diagnostic test results in Uganda
Source: Research Square preprint supplement (doi:10.21203/rs.3.rs-6603474/v1), 2025-05-20
Supplement: Supplementary file 1 [file 5e6de915e7442557c175ef02.docx]

| **RDT administration step** |
| --- |
| Assembles all material |
| Checks the expiry date |
| Puts on gloves |
| Removes contents from the packet |
| Writes the patient’s identifier on the test |
| Explains the procedure to the patient |
| Selects the correct finger for blood collection |
| Cleans the finger with the alcohol swab and allow it to dry |
| Pricks finger firmly with sterile lancet |
| Discards the lancet in the sharps bin |
| Does not squeeze finger excessively |
| Collects an adequate volume of blood |
| Dispenses blood in the appropriate well |
| Discards the pipette in the sharps box |
| Dispenses the correct number of drops of buffer |
| Disposes of waste in a non-sharps waste container |
| Waits for the appropriate time after adding a buffer to read the result |
| Interprets test correctly |
| Identifies control line correctly |
